# Supplementary material
Source: publisher site journal article supplement (https://static.cambridge.org/content/id/urn:cambridge.org:id:article:S1537592720001218/resource/name/S1537592720001218supp001.docx)
Supplement: Supplementary file 1 [file S1537592720001218supp001.docx]

**Supplemental Materials**

Table A1. Party platforms supporting international partnership and military power by party type, 1970-2017

Table A2. Predicted international partnership and military power by weighted manifesto score and mainstream vote share (or mainstream-minus-radical vote share), 1970-2017

Table A3. Party electoral success as a function of platform support for international partnership and military power, 1970-2017

Figure A1. Party platform support for international partnership and military power by selected party systems, 1970-2017

Figure A1a. Partnership

Figure A1b. Power

Figure A2. Party platform support for international partnership and military power by party type, 1970-2017

Figure A2a. Partnership

Figure A2b. Power

Figure A3. Government and voter support for international partnership and military power by EU, US, and Japan, 1970-2017

Figure A3a1. EU-15 partnership

Figure A3a2. United States partnership

Figure A3a3. Japan partnership

Figure A3b1. EU power

Figure A3b2. United States power

Figure A3b3. Japan power
